# Supplementary material for: Identifying key factors of peroxymonosulfate activation on single-atom M–N–C catalysts: a combined density functional theory and machine learning study
Source: Royal Society of Chemistry journal article supplement (doi:10.1039/d3ta02371k), 2023-01-01
Supplement: d3ta02371k1.pdf [file d3ta02371k1.pdf]

1

## SUPPLEMENTARY INFORMATION

2

**Identifying key factors of peroxymonosulfate activation on single-atom M–N–C**

3

**catalysts: A combined density functional theory and machine learning study**

4

**Yun Sun<sup>1</sup>, Jiachun Cao<sup>1,2</sup>, Qianyu Li<sup>2</sup>, Didi Li<sup>1</sup>, Zhimin Ao<sup>2\*</sup>**

5

*<sup>1</sup>Institute of Environmental Health and Pollution Control, School of Environmental*

6

*Science and Engineering, Guangdong University of Technology, Guangzhou 510006,*

7

*PR China*

8

*<sup>2</sup>Advanced Interdisciplinary Institute of Environment and Ecology, Beijing Normal*

9

*University, Zhuhai 519087, PR China*

10

*Corresponding author's email address: [zhimin.ao@bnu.edu.cn](mailto:zhimin.ao@bnu.edu.cn)*

11

12

**Pages (9)**

13

**Text (1)**

14

**Text S1** Empirical Risk Minimization for few-shot learning (FSL)

15

**Tables (6)**

16

**Table S1** The formation energy ( $E_f$ ) of M@N<sub>2</sub>C<sub>2</sub>, M@N<sub>3</sub>C<sub>1</sub> and M@N<sub>4</sub>.

17

**Table S2** The adsorption energy ( $E_{ad}$ ), O–O bond length ( $l_{O-O}$ ), and electron transfer

18

( $q$ ) for the four adsorption configurations of PMS on Fe@N<sub>4</sub>.

19

**Table S3** The d-band center ( $\varepsilon_d$ ), the upper-edge of the d-band ( $\varepsilon^{dW}$ ) and

20

adsorption energy ( $E_{ad}$ ).

21 **Table S4** The DFT calculated activation energy barrier ( $E_{\text{bar}}$ ) and reaction energy  
22 ( $\Delta E$ ).

23 **Table S5** The input data electronegativity ( $E$ ), d-electron count ( $\nu_d$ ), group number  
24 ( $g$ ), radius ( $r_M$ ) and the number of nitrogen atoms ( $N_N$ ).

25 **Table S6** The mutual information (MI) and Pearson correlation coefficient (P) of  
26 the features.

## 27 **Figures (4)**

28 **Fig. S1** Partial density of states (PDOS) of d orbitals for  $M@N_2C_2$ . The d-band  
29 centers ( $\epsilon_d$ ) are labeled for 3d metals, from Sc to Zn (green); 4d metals, from  
30 Y to Cd (purple); and 5d metals, from Hf to Au (yellow). The Fermi level ( $E_F$ )  
31 is set to 0 eV.

32 **Fig. S2** Partial density of states (PDOS) of d orbitals for  $M@N_3C_1$ . The d-band  
33 centers ( $\epsilon_d$ ) are labeled for 3d metals, from Sc to Zn (green); 4d metals, from  
34 Y to Cd (purple); and 5d metals, from Hf to Au (yellow). The Fermi level ( $E_F$ )  
35 is set to 0 eV.

36 **Fig. S3** The selected 27 catalysts for training (yellow) and 34 catalysts for  
37 predicting (blue).

38 **Fig. S4** Partial density of states (PDOS) for (a)  $Fe@N_2C_2$ , (b)  $Fe@N_3C_1$ , and (c)  
39  $Fe@N_4$ .

40  
41

42 **Text S1 Empirical Risk Minimization for few-shot learning (FSL)**

43 The core issue of FSL based on error decomposition in supervised machine learning is  
 44 empirical risk minimization. Given a hypothesis  $h$ , we want to minimize its expected  
 45 risk  $R$ , which is the loss measured with respect to  $p(x,y)$ . Specifically,

46 
$$R(h) = \int l(h(x),y)dp(x,y) = E[l(h(x),y)]$$

47 As  $p(x,y)$  is unknown, the empirical risk (which is the average of sample losses  
 48 over the training set  $D_{\text{train}}$  of  $I$  samples)

49 
$$R_I(h) = \frac{1}{I} \sum_{i=1}^I l(h(x),y)$$

50 is usually used as a proxy for  $R(h)$ , leading to empirical risk minimization (with possibly  
 51 some regularizers). For illustration, let

- 52 •  $\hat{h} = \arg \min_h R(h)$  be the function that minimizes the expected risk;
- 53 •  $h^* = \arg \min_{h \in H} R(h)$  be the function in  $H$  that minimizes the expected risk;
- 54 •  $h_I = \arg \min_{h \in H} R_I(h)$  be the function in  $H$  that minimizes the empirical risk.

55 As  $\hat{h}$  is unknown, one has to approximate it by some  $h \in H$ .  $h^*$  is the best  
 56 approximation for  $\hat{h}$  in  $H$ , while  $h_I$  is the best hypothesis in  $H$  obtained by empirical  
 57 risk minimization. For simplicity, we assume that  $\hat{h}$ ,  $h^*$  and  $h_I$  are unique. The total  
 58 error can be decomposed as:

59 
$$E[R(h_I) - R(\hat{h})] = \underbrace{E[R(h^*) - R(\hat{h})]}_{\varepsilon_{\text{app}}(H)} + \underbrace{E[R(h_I) - R(h^*)]}_{\varepsilon_{\text{est}}(H,I)},$$

60 where the expectation is with respect to the random choice of  $D_{\text{train}}$ . The  
 61 approximation error  $\varepsilon_{\text{app}}(H)$  measures how close the functions in  $H$  can approximate  
 62 the optimal hypothesis  $\hat{h}$ , and the estimation error  $\varepsilon_{\text{est}}(H,I)$  measures the effect of

63 minimizing the empirical risk  $R_I(h)$  instead of the expected risk  $R(h)$  within  $H$ .

64 As shown, the total error is affected by  $H$  (hypothesis space) and  $I$  (number of  
65 examples in  $D_{\text{train}}$ ). In other words, learning to reduce the total error can be attempted  
66 from the perspectives of (i) data, which provides  $D_{\text{train}}$ ; (ii) model, which determines  
67  $H$ ; and (iii) algorithm, which searches for the optimal  $h_I \in H$  that fits  $D_{\text{train}}$ .<sup>1</sup>

68

69

70

71

72 **Table S1** The formation energy ( $E_f$ ) of  $M@N_2C_2$ ,  $M@N_3C_1$  and  $M@N_4$ .

| No. | Metal | Base     | $E_f$  |
|-----|-------|----------|--------|
| 1   | Sc    | $N_2C_2$ | -3.061 |
| 2   | Ti    | $N_2C_2$ | -2.223 |
| 3   | V     | $N_2C_2$ | -1.998 |
| 4   | Cr    | $N_2C_2$ | -2.454 |
| 5   | Mn    | $N_2C_2$ | -3.599 |
| 6   | Fe    | $N_2C_2$ | -2.704 |
| 7   | Co    | $N_2C_2$ | -5.238 |
| 8   | Ni    | $N_2C_2$ | -4.695 |
| 9   | Cu    | $N_2C_2$ | -4.348 |
| 10  | Zn    | $N_2C_2$ | -3.806 |
| 11  | Y     | $N_2C_2$ | -1.279 |
| 12  | Zr    | $N_2C_2$ | -0.070 |
| 13  | Nb    | $N_2C_2$ | 0.479  |
| 14  | Mo    | $N_2C_2$ | 0.073  |
| 15  | Tc    | $N_2C_2$ | 0.728  |
| 16  | Ru    | $N_2C_2$ | -1.829 |
| 17  | Rh    | $N_2C_2$ | -3.800 |
| 18  | Pd    | $N_2C_2$ | -3.550 |
| 19  | Ag    | $N_2C_2$ | -2.373 |
| 20  | Cd    | $N_2C_2$ | -2.069 |
| 21  | Hf    | $N_2C_2$ | -0.519 |
| 22  | Ta    | $N_2C_2$ | 0.641  |
| 23  | W     | $N_2C_2$ | 0.964  |
| 24  | Re    | $N_2C_2$ | 0.482  |
| 25  | Os    | $N_2C_2$ | -1.453 |
| 26  | Ir    | $N_2C_2$ | -3.603 |
| 27  | Pt    | $N_2C_2$ | -3.074 |
| 28  | Au    | $N_2C_2$ | -2.129 |
| 29  | Sc    | $N_3C_1$ | -2.982 |
| 30  | Ti    | $N_3C_1$ | -1.771 |
| 31  | V     | $N_3C_1$ | -1.380 |
| 32  | Cr    | $N_3C_1$ | -2.235 |
| 33  | Mn    | $N_3C_1$ | -3.072 |
| 34  | Fe    | $N_3C_1$ | -3.022 |
| 35  | Co    | $N_3C_1$ | -4.808 |
| 36  | Ni    | $N_3C_1$ | -4.113 |
| 37  | Cu    | $N_3C_1$ | -3.367 |
| 38  | Zn    | $N_3C_1$ | -3.318 |
| 39  | Y     | $N_3C_1$ | -1.200 |
| 40  | Zr    | $N_3C_1$ | 0.286  |
| 41  | Nb    | $N_3C_1$ | 1.061  |
| 42  | Mo    | $N_3C_1$ | 0.814  |
| 43  | Tc    | $N_3C_1$ | 1.609  |
| 44  | Ru    | $N_3C_1$ | -1.346 |
| 45  | Rh    | $N_3C_1$ | -3.551 |
| 46  | Pd    | $N_3C_1$ | -3.096 |
| 47  | Ag    | $N_3C_1$ | -1.377 |
| 48  | Cd    | $N_3C_1$ | -1.472 |
| 49  | Hf    | $N_3C_1$ | -0.153 |
| 50  | Ta    | $N_3C_1$ | 1.210  |
| 51  | W     | $N_3C_1$ | 1.701  |
| 52  | Re    | $N_3C_1$ | 1.379  |
| 53  | Os    | $N_3C_1$ | -0.783 |
| 54  | Ir    | $N_3C_1$ | -3.344 |
| 55  | Pt    | $N_3C_1$ | -2.627 |

| No. | Metal | Base                          | $E_f$  |
|-----|-------|-------------------------------|--------|
| 56  | Au    | N <sub>3</sub> C <sub>1</sub> | -1.149 |
| 57  | Sc    | N <sub>4</sub>                | -2.712 |
| 58  | Ti    | N <sub>4</sub>                | -1.108 |
| 59  | V     | N <sub>4</sub>                | -0.616 |
| 60  | Cr    | N <sub>4</sub>                | -1.808 |
| 61  | Mn    | N <sub>4</sub>                | -2.247 |
| 62  | Fe    | N <sub>4</sub>                | -2.260 |
| 63  | Co    | N <sub>4</sub>                | -4.042 |
| 64  | Ni    | N <sub>4</sub>                | -3.021 |
| 65  | Cu    | N <sub>4</sub>                | -2.301 |
| 66  | Zn    | N <sub>4</sub>                | -3.008 |
| 67  | Y     | N <sub>4</sub>                | -1.163 |
| 68  | Zr    | N <sub>4</sub>                | 0.937  |
| 69  | Nb    | N <sub>4</sub>                | 2.079  |
| 70  | Mo    | N <sub>4</sub>                | 2.061  |
| 71  | Tc    | N <sub>4</sub>                | 2.445  |
| 72  | Ru    | N <sub>4</sub>                | -0.767 |
| 73  | Rh    | N <sub>4</sub>                | -2.867 |
| 74  | Pd    | N <sub>4</sub>                | -2.016 |
| 75  | Ag    | N <sub>4</sub>                | 0.106  |
| 76  | Cd    | N <sub>4</sub>                | -1.192 |
| 77  | Hf    | N <sub>4</sub>                | 0.492  |
| 78  | Ta    | N <sub>4</sub>                | 2.188  |
| 79  | W     | N <sub>4</sub>                | 3.053  |
| 80  | Re    | N <sub>4</sub>                | 2.400  |
| 81  | Os    | N <sub>4</sub>                | -0.203 |
| 82  | Ir    | N <sub>4</sub>                | -2.677 |
| 83  | Pt    | N <sub>4</sub>                | -1.588 |
| 84  | Au    | N <sub>4</sub>                | 0.625  |

73 \*The 23 catalysts with positive formation energy were marked in gray, and excluded  
74 from subsequent calculations.

75

76

77 **Table S2.** The adsorption energy ( $E_{ad}$ ), O-O bond length ( $l_{O-O}$ ), and electron transfer ( $q$ )

78 for the four adsorption configurations of PMS on Fe@N<sub>4</sub>.

|   | $E_{ad}$ (eV) | $l_{O-O}$ (Å) | $q$ (e) |
|---|---------------|---------------|---------|
| 1 | -2.20         | 1.47          | 0.19    |
| 2 | -1.86         | 1.46          | 0.26    |
| 3 | -1.87         | 1.47          | 0.26    |
| 4 | -2.16         | 1.50          | 0.12    |

79

80

81

82

83

84

85 **Table S3.** The d-band center ( $\epsilon_d$ ), the upper-edge of the d-band ( $\epsilon_d^W$ ) and adsorption  
 86 energy ( $E_{ad}$ ).

| No. | Metal | Base                          | $\epsilon_d$ (eV) | $\epsilon_d^W$ (eV) | $E_{ad}$ (eV) |
|-----|-------|-------------------------------|-------------------|---------------------|---------------|
| 1   | Sc    | N <sub>2</sub> C <sub>2</sub> | 0.07              | 7.86                | -5.69         |
| 2   | Ti    | N <sub>2</sub> C <sub>2</sub> | -0.32             | 6.31                | -5.03         |
| 3   | V     | N <sub>2</sub> C <sub>2</sub> | -0.87             | 5.47                | -4.37         |
| 4   | Cr    | N <sub>2</sub> C <sub>2</sub> | -0.27             | 6.23                | -3.56         |
| 5   | Mn    | N <sub>2</sub> C <sub>2</sub> | -1.61             | 4.64                | -2.73         |
| 6   | Fe    | N <sub>2</sub> C <sub>2</sub> | -1.55             | 4.18                | -3.06         |
| 7   | Co    | N <sub>2</sub> C <sub>2</sub> | -0.81             | 4.50                | -2.23         |
| 8   | Ni    | N <sub>2</sub> C <sub>2</sub> | -1.21             | 3.58                | -1.82         |
| 9   | Cu    | N <sub>2</sub> C <sub>2</sub> | -4.24             | 0.35                | -1.94         |
| 10  | Zn    | N <sub>2</sub> C <sub>2</sub> | -6.70             | -3.23               | -2.26         |
| 11  | Y     | N <sub>2</sub> C <sub>2</sub> | -0.67             | 8.08                | -7.79         |
| 12  | Zr    | N <sub>2</sub> C <sub>2</sub> | -0.67             | 6.86                | -7.20         |
| 13  | Ru    | N <sub>2</sub> C <sub>2</sub> | -2.27             | 4.67                | -4.35         |
| 14  | Rh    | N <sub>2</sub> C <sub>2</sub> | -2.00             | 3.82                | -3.16         |
| 15  | Pd    | N <sub>2</sub> C <sub>2</sub> | -2.23             | 4.04                | -1.91         |
| 16  | Ag    | N <sub>2</sub> C <sub>2</sub> | -5.99             | -0.40               | -1.98         |
| 17  | Cd    | N <sub>2</sub> C <sub>2</sub> | -9.53             | -4.93               | -3.79         |
| 18  | Hf    | N <sub>2</sub> C <sub>2</sub> | -0.74             | 6.89                | -7.63         |
| 19  | Os    | N <sub>2</sub> C <sub>2</sub> | -2.31             | 4.76                | -4.72         |
| 20  | Ir    | N <sub>2</sub> C <sub>2</sub> | -2.10             | 3.89                | -3.72         |
| 21  | Pt    | N <sub>2</sub> C <sub>2</sub> | -2.98             | 2.73                | -2.07         |
| 22  | Au    | N <sub>2</sub> C <sub>2</sub> | -6.08             | 0.09                | -2.14         |
| 23  | Sc    | N <sub>3</sub> C <sub>1</sub> | 0.83              | 8.23                | -5.45         |
| 24  | Ti    | N <sub>3</sub> C <sub>1</sub> | -0.50             | 6.29                | -4.81         |
| 25  | V     | N <sub>3</sub> C <sub>1</sub> | -0.81             | 5.71                | -4.00         |
| 26  | Cr    | N <sub>3</sub> C <sub>1</sub> | -0.26             | 6.47                | -2.96         |
| 27  | Mn    | N <sub>3</sub> C <sub>1</sub> | -1.22             | 5.49                | -2.59         |
| 28  | Fe    | N <sub>3</sub> C <sub>1</sub> | -1.27             | 4.61                | -2.37         |
| 29  | Co    | N <sub>3</sub> C <sub>1</sub> | -0.67             | 4.79                | -2.23         |
| 30  | Ni    | N <sub>3</sub> C <sub>1</sub> | -1.66             | 3.26                | -1.96         |
| 31  | Cu    | N <sub>3</sub> C <sub>1</sub> | -4.01             | 0.61                | -2.03         |
| 32  | Zn    | N <sub>3</sub> C <sub>1</sub> | -6.56             | -3.04               | -2.56         |
| 33  | Y     | N <sub>3</sub> C <sub>1</sub> | -0.68             | 8.54                | -7.80         |
| 34  | Ru    | N <sub>3</sub> C <sub>1</sub> | -1.67             | 4.73                | -3.35         |
| 35  | Rh    | N <sub>3</sub> C <sub>1</sub> | -1.78             | 4.27                | -2.26         |
| 36  | Pd    | N <sub>3</sub> C <sub>1</sub> | -2.94             | 3.42                | -1.96         |
| 37  | Ag    | N <sub>3</sub> C <sub>1</sub> | -6.15             | -0.50               | -1.97         |
| 38  | Cd    | N <sub>3</sub> C <sub>1</sub> | -9.04             | -4.53               | -4.32         |
| 39  | Hf    | N <sub>3</sub> C <sub>1</sub> | -0.70             | 7.22                | -6.87         |
| 40  | Os    | N <sub>3</sub> C <sub>1</sub> | -1.69             | 4.76                | -3.82         |
| 41  | Ir    | N <sub>3</sub> C <sub>1</sub> | -1.87             | 4.30                | -2.52         |
| 42  | Pt    | N <sub>3</sub> C <sub>1</sub> | -3.36             | 3.07                | -2.05         |
| 43  | Au    | N <sub>3</sub> C <sub>1</sub> | -6.28             | 0.00                | -2.15         |
| 44  | Sc    | N <sub>4</sub>                | 0.16              | 7.51                | -5.14         |
| 45  | Ti    | N <sub>4</sub>                | -0.49             | 6.39                | -4.23         |
| 46  | V     | N <sub>4</sub>                | -0.01             | 7.04                | -4.12         |
| 47  | Cr    | N <sub>4</sub>                | -0.10             | 6.97                | -2.50         |
| 48  | Mn    | N <sub>4</sub>                | -1.13             | 5.65                | -2.36         |
| 49  | Fe    | N <sub>4</sub>                | -0.39             | 5.28                | -2.20         |
| 50  | Co    | N <sub>4</sub>                | -1.02             | 4.58                | -1.99         |

| No. | Metal | Base           | $\epsilon_d$ (eV) | (eV)  | $E_{ad}$ (eV) |
|-----|-------|----------------|-------------------|-------|---------------|
| 51  | Ni    | N <sub>4</sub> | -2.00             | 3.02  | -1.85         |
| 52  | Cu    | N <sub>4</sub> | -3.39             | 1.19  | -2.01         |
| 53  | Zn    | N <sub>4</sub> | -6.65             | -3.00 | -2.46         |
| 54  | Y     | N <sub>4</sub> | -0.24             | 8.92  | -7.33         |
| 55  | Ru    | N <sub>4</sub> | -1.53             | 5.17  | -2.53         |
| 56  | Rh    | N <sub>4</sub> | -2.10             | 4.20  | -1.93         |
| 57  | Pd    | N <sub>4</sub> | -3.27             | 3.16  | -1.93         |
| 58  | Cd    | N <sub>4</sub> | -8.56             | -4.03 | -4.18         |
| 59  | Os    | N <sub>4</sub> | -1.51             | 5.22  | -2.68         |
| 60  | Ir    | N <sub>4</sub> | -2.16             | 4.27  | -1.98         |
| 61  | Pt    | N <sub>4</sub> | -3.35             | 3.63  | -1.98         |

87

88

89

90

91

92 **Table S4.** The DFT calculated activation energy barrier ( $E_{bar}$ ) and reaction energy ( $\Delta E$ ).

| No. | Metal | Base                          | $E_{bar}$ | $\Delta E$ |
|-----|-------|-------------------------------|-----------|------------|
| 1   | Sc    | N <sub>2</sub> C <sub>2</sub> | 2.36      | -41.55     |
| 2   | Ti    | N <sub>2</sub> C <sub>2</sub> | 4.20      | -41.20     |
| 3   | V     | N <sub>2</sub> C <sub>2</sub> | 2.25      | -28.67     |
| 4   | Cr    | N <sub>2</sub> C <sub>2</sub> | 1.78      | -38.61     |
| 5   | Co    | N <sub>2</sub> C <sub>2</sub> | 7.81      | -9.29      |
| 6   | Y     | N <sub>2</sub> C <sub>2</sub> | 0.75      | -3.54      |
| 7   | Zr    | N <sub>2</sub> C <sub>2</sub> | 4.91      | -32.66     |
| 8   | Hf    | N <sub>2</sub> C <sub>2</sub> | 0.47      | -34.96     |
| 9   | Ir    | N <sub>2</sub> C <sub>2</sub> | 1.64      | -4.35      |
| 10  | V     | N <sub>3</sub> C <sub>1</sub> | 1.29      | -52.66     |
| 11  | Ni    | N <sub>3</sub> C <sub>1</sub> | 9.62      | -0.12      |
| 12  | Cu    | N <sub>3</sub> C <sub>1</sub> | 17.45     | 0.00       |
| 13  | Zn    | N <sub>3</sub> C <sub>1</sub> | 9.44      | -4.11      |
| 14  | Ru    | N <sub>3</sub> C <sub>1</sub> | 2.95      | -16.30     |
| 15  | Rh    | N <sub>3</sub> C <sub>1</sub> | 6.86      | -8.22      |
| 16  | Ag    | N <sub>3</sub> C <sub>1</sub> | 12.17     | -18.92     |
| 17  | Cd    | N <sub>3</sub> C <sub>1</sub> | 4.95      | -0.95      |
| 18  | Ir    | N <sub>3</sub> C <sub>1</sub> | 4.99      | -23.35     |
| 19  | Ti    | N <sub>4</sub>                | 0.84      | -43.75     |
| 20  | Mn    | N <sub>4</sub>                | 1.98      | -33.01     |
| 21  | Fe    | N <sub>4</sub>                | 3.09      | -22.69     |
| 22  | Co    | N <sub>4</sub>                | 7.45      | -13.70     |
| 23  | Ni    | N <sub>4</sub>                | 14.16     | -1.38      |
| 24  | Cu    | N <sub>4</sub>                | 14.68     | -3.53      |
| 25  | Zn    | N <sub>4</sub>                | 4.91      | -7.01      |
| 26  | Ru    | N <sub>4</sub>                | 4.77      | -22.30     |
| 27  | Os    | N <sub>4</sub>                | 4.38      | -24.98     |

93

94



95 **Table S5.** The input data electronegativity ( $E$ ), d-electron count ( $\vartheta_d$ ), group number  
 96 ( $g$ ), radius ( $r_M$ ) and the number of nitrogen atoms ( $N_N$ ).

| No. | Meta<br>I | Base                          | $E$  | $\vartheta_d$ | $g$ | $r_M$ | $N_N$ |
|-----|-----------|-------------------------------|------|---------------|-----|-------|-------|
| 1   | Sc        | N <sub>2</sub> C <sub>2</sub> | 1.36 | 1             | 3   | 1.7   | 2     |
| 2   | Ti        | N <sub>2</sub> C <sub>2</sub> | 1.54 | 2             | 4   | 1.6   | 2     |
| 3   | V         | N <sub>2</sub> C <sub>2</sub> | 1.63 | 3             | 5   | 1.53  | 2     |
| 4   | Cr        | N <sub>2</sub> C <sub>2</sub> | 1.66 | 5             | 6   | 1.39  | 2     |
| 5   | Co        | N <sub>2</sub> C <sub>2</sub> | 1.88 | 7             | 8   | 1.26  | 2     |
| 6   | Y         | N <sub>2</sub> C <sub>2</sub> | 1.22 | 1             | 3   | 1.9   | 2     |
| 7   | Zr        | N <sub>2</sub> C <sub>2</sub> | 1.33 | 2             | 4   | 1.75  | 2     |
| 8   | Hf        | N <sub>2</sub> C <sub>2</sub> | 1.30 | 2             | 4   | 1.75  | 2     |
| 9   | Ir        | N <sub>2</sub> C <sub>2</sub> | 2.20 | 7             | 8   | 1.41  | 2     |
| 10  | V         | N <sub>3</sub> C <sub>1</sub> | 1.63 | 3             | 5   | 1.53  | 3     |
| 11  | Ni        | N <sub>3</sub> C <sub>1</sub> | 1.91 | 8             | 8   | 1.24  | 3     |
| 12  | Cu        | N <sub>3</sub> C <sub>1</sub> | 1.90 | 10            | 1   | 1.32  | 3     |
| 13  | Zn        | N <sub>3</sub> C <sub>1</sub> | 1.65 | 10            | 2   | 1.22  | 3     |
| 14  | Ru        | N <sub>3</sub> C <sub>1</sub> | 2.20 | 7             | 8   | 1.46  | 3     |
| 15  | Rh        | N <sub>3</sub> C <sub>1</sub> | 2.28 | 8             | 8   | 1.42  | 3     |
| 16  | Ag        | N <sub>3</sub> C <sub>1</sub> | 1.93 | 10            | 1   | 1.45  | 3     |
| 17  | Cd        | N <sub>3</sub> C <sub>1</sub> | 1.69 | 10            | 2   | 1.44  | 3     |
| 18  | Ir        | N <sub>3</sub> C <sub>1</sub> | 2.20 | 7             | 8   | 1.41  | 3     |
| 19  | Ti        | N <sub>4</sub>                | 1.54 | 2             | 4   | 1.6   | 4     |
| 20  | Mn        | N <sub>4</sub>                | 1.55 | 5             | 7   | 1.39  | 4     |
| 21  | Fe        | N <sub>4</sub>                | 1.83 | 6             | 8   | 1.32  | 4     |
| 22  | Co        | N <sub>4</sub>                | 1.88 | 7             | 8   | 1.26  | 4     |
| 23  | Ni        | N <sub>4</sub>                | 1.91 | 8             | 8   | 1.24  | 4     |
| 24  | Cu        | N <sub>4</sub>                | 1.90 | 10            | 1   | 1.32  | 4     |
| 25  | Zn        | N <sub>4</sub>                | 1.65 | 10            | 2   | 1.22  | 4     |
| 26  | Ru        | N <sub>4</sub>                | 2.20 | 7             | 8   | 1.46  | 4     |
| 27  | Os        | N <sub>4</sub>                | 2.20 | 6             | 8   | 1.44  | 4     |

97  
 98  
 99

100 **Table S6.** The mutual information (MI) and Pearson correlation coefficient (P) of the  
 101 features.

|           | $E$  | $\vartheta_d$ | $g$  | $r_M$ | $N_N$ |
|-----------|------|---------------|------|-------|-------|
| <b>MI</b> | 0.33 | 0.35          | 0.53 | 0.28  | 0.1   |
| <b>P</b>  | 0.34 | 0.71          | 0.68 | -0.57 | 0.30  |

102  
 103

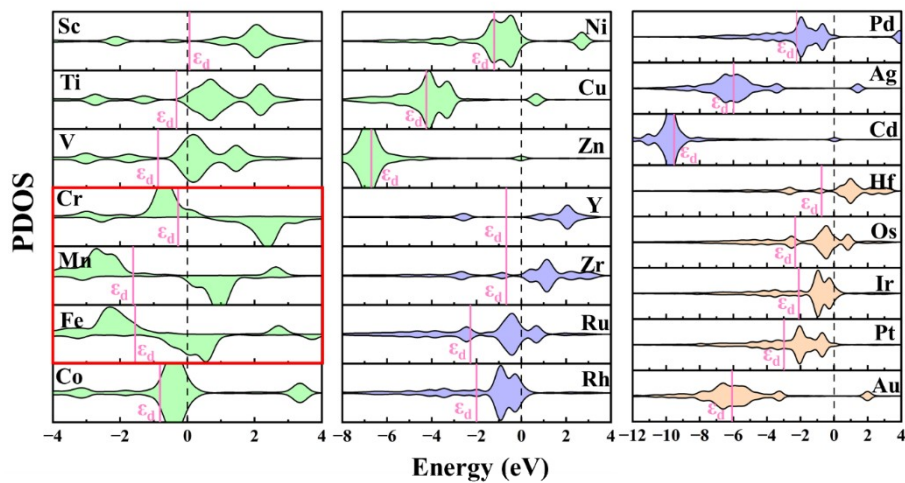

105 **Fig. S1.** Partial density of states (PDOS) of d orbitals for  $M@N_2C_2$ . The d-band centers  
 106 ( $\epsilon_d$ ) are labeled for 3d metals, from Sc to Zn (green); 4d metals, from Y to Cd (purple);  
 107 and 5d metals, from Hf to Au (yellow). The Fermi level ( $E_F$ ) is set to 0 eV.

108  
 109

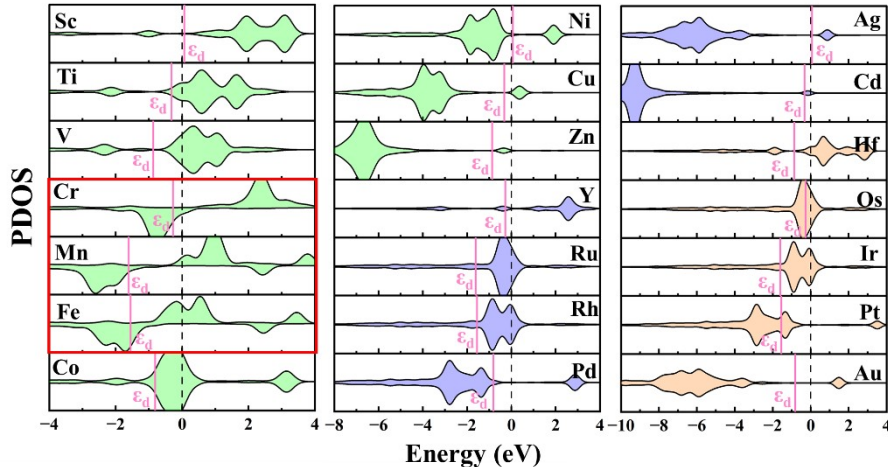

110 **Fig. S2.** Partial density of states (PDOS) of d orbitals for  $M@N_3C_1$ . The d-band centers  
 111 ( $\epsilon_d$ ) are labeled for 3d metals, from Sc to Zn (green); 4d metals, from Y to Cd (purple);  
 112 and 5d metals, from Hf to Au (yellow). The Fermi level ( $E_F$ ) is set to 0 eV.

113

|            | 3  | 4  | 5  | 6  | 7  | 8  | 9  | 10 | 11 | 12 |
|------------|----|----|----|----|----|----|----|----|----|----|
| $M@N_2C_2$ | Sc | Ti | V  | Cr | Mn | Fe | Co | Ni | Cu | Zn |
|            | Y  | Zr | Nb | Mo | Tc | Ru | Rh | Pd | Ag | Cd |
|            |    | Hf | Ta | W  | Re | Os | Ir | Pt | Au |    |
| $M@N_3C_1$ | Sc | Ti | V  | Cr | Mn | Fe | Co | Ni | Cu | Zn |
|            | Y  | Zr | Nb | Mo | Tc | Ru | Rh | Pd | Ag | Cd |
|            |    | Hf | Ta | W  | Re | Os | Ir | Pt | Au |    |
| $M@N_4$    | Sc | Ti | V  | Cr | Mn | Fe | Co | Ni | Cu | Zn |
|            | Y  | Zr | Nb | Mo | Tc | Ru | Rh | Pd | Ag | Cd |
|            |    | Hf | Ta | W  | Re | Os | Ir | Pt | Au |    |

114

115 **Fig. S3.** The selected 27 catalysts for training (yellow) and 34 catalysts for predicting  
116 (blue).

117

118

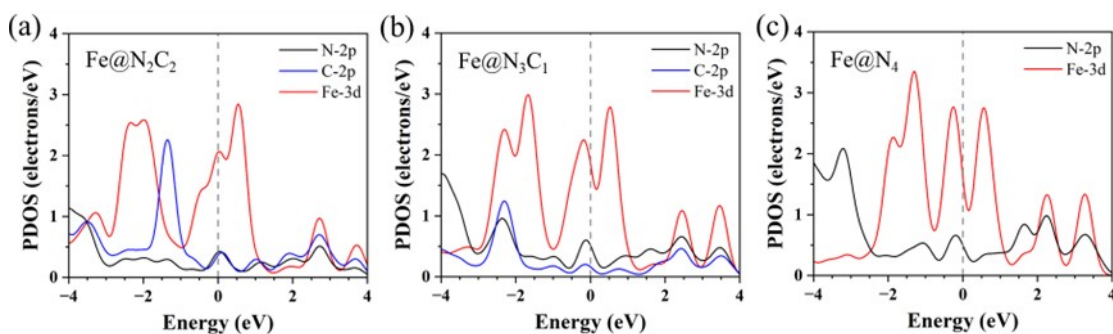

119

120 **Fig. S4** Partial density of states (PDOS) for (a)  $Fe@N_2C_2$ , (b)  $Fe@N_3C_1$ , and (c)  $Fe@N_4$ .

121

122

123

124 **Reference**

- 125 1. Y. Q. Wang, Q. M. Yao, J. T. Kwok and L. M. Ni, *Acm Computing Surveys*, 2020, 53,  
126 1-34.

127
